# Supplementary material for: Polyoxometalate-based frameworks with a linker of paddlewheel diruthenium(ii, iii) complexes
Source: Royal Society of Chemistry journal article supplement (doi:10.1039/c3ce40426a), 2013-01-01
Supplement: c3ce40426a.pdf [file c3ce40426a.pdf]

*Supporting Information*

**Polyoxometalate-based frameworks with a linker of paddlewheel diruthenium(II, III) complexes**

Akihiro Hashikawa,<sup>a</sup> Yuki Sawada,<sup>a</sup> Yuma Yamamoto,<sup>a</sup> Masaki Nishio,<sup>a</sup> Wataru Kosaka,<sup>a</sup> Yoshihito Hayashi<sup>a</sup> and Hitoshi Miyasaka<sup>\*a,b</sup>

<sup>a</sup> *Department of Chemistry, Division of Material Sciences, Graduate School of Natural Science and Technology, Kanazawa University, Kakuma-machi, Kanazawa 920-1192, Japan*

<sup>b</sup> *Institute for Materials Research, Tohoku University, 2-1-1 Katahira, Aoba-ku, Sendai 980-8577, Japan.*

\* Corresponding author

Prof. Dr. Hitoshi Miyasaka

Institute for Materials Research, Tohoku University, 2-1-1 Katahira, Aoba-ku, Sendai 980-8577, Japan

Tel: +81-22-215-2030

Fax: +81-22-215-2031

E-mail: miyasaka@imr.tohoku.ac.jp

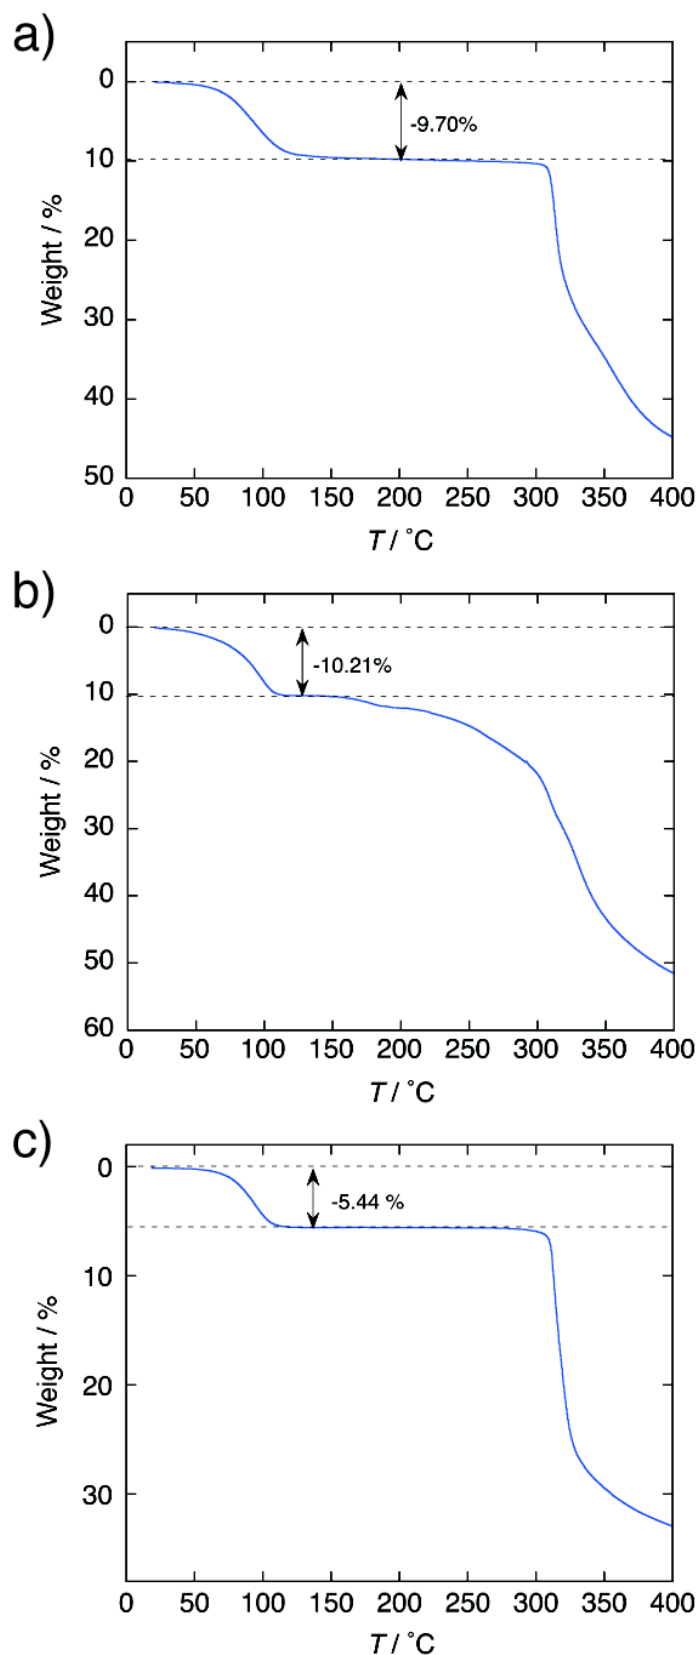

**Figure S1.** TGA curves for **1** (a), **2** (b), and **3** (c), where the loss of weight almost corresponds to amount of crystallization solvents;  $\text{CH}_2\text{Cl}_2 \cdot \text{C}_2\text{H}_4\text{Cl}_2$  (9.61 %) for **1**,  $\text{C}_2\text{H}_4\text{Cl}_2 \cdot 9.5\text{H}_2\text{O}$  (10.06 %) for **2**, and  $2(\text{C}_2\text{H}_4\text{Cl}_2)$  (5.52 %) for **3** determined by X-ray crystallography and elemental analyses.

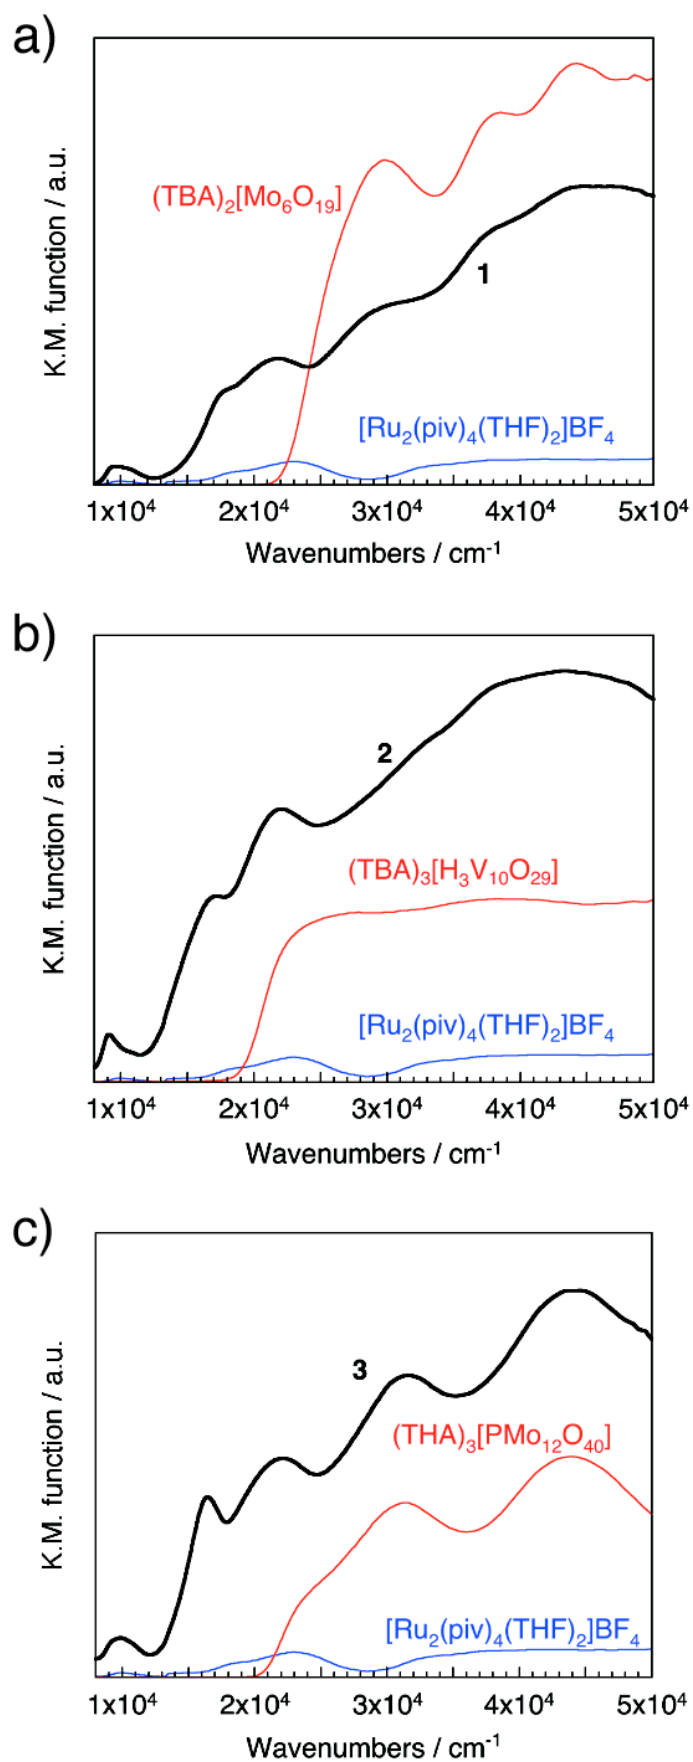

**Figure S2.** Powder reflection spectra of **1** (a), **2** (b), and **3** (c) together with the precursors of [Ru<sub>2</sub>]BF<sub>4</sub> (blue) and POMs (red) measured based on a BaSO<sub>4</sub> pellet.
